# Supplementary material for: Revising chronological uncertainties in marine archives using global anthropogenic signals: a case study
Source: Copernicus journal article supplement (doi:10.5194/egusphere-2023-2845), 2023-12-15
Supplement: Supplementary file 1 [file egusphere-2023-2845-supplement.zip]

## **Supplementary Information for**

### **Revising chronological uncertainties in marine archives using global anthropogenic signals: *a case study***

Nil Irvalı, Ulysses S. Ninnemann, Are Olsen, Neil L. Rose, David J. R. Thornalley, Tor L. Mjell, François Counillon

Corresponding author: Nil Irvalı ([nil.irvali@uib.no](mailto:nil.irvali@uib.no))

**This PDF File includes**  
Supplementary Figures 1 to 3

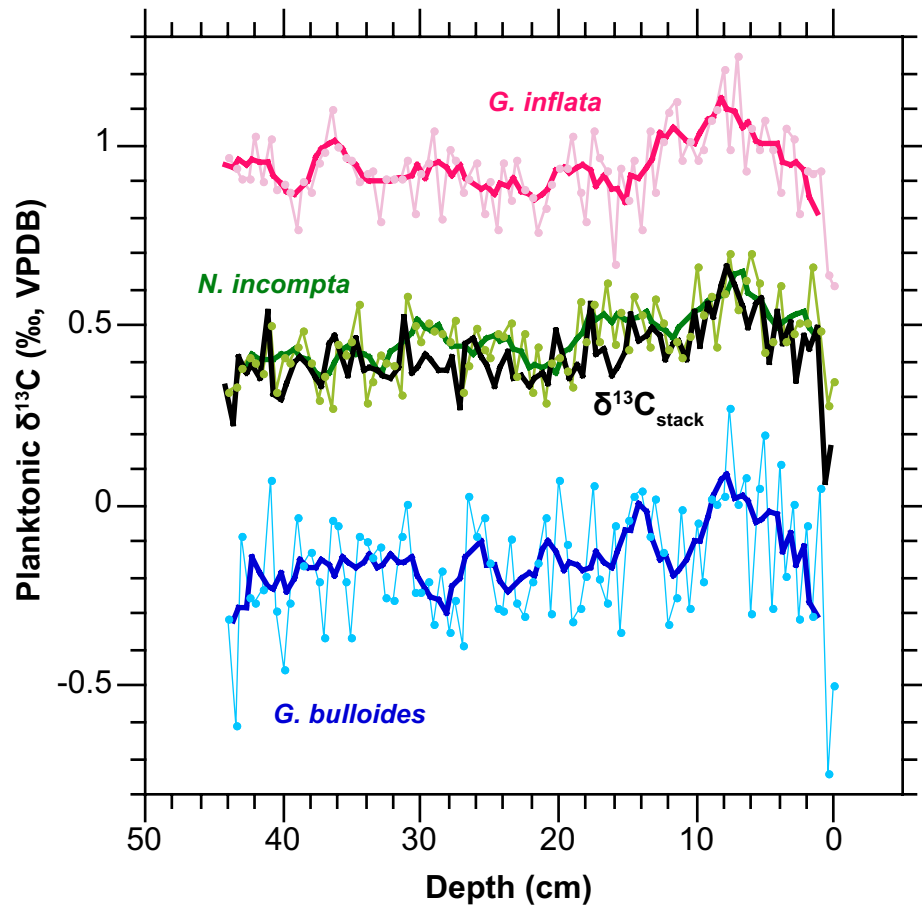

**Supplementary Figure 1:** *G. bulloides*, *N. incompta* and *G. inflata*  $\delta^{13}\text{C}$  records plotted together with the  $\delta^{13}\text{C}_{\text{stack}}$  vs depth (cm).

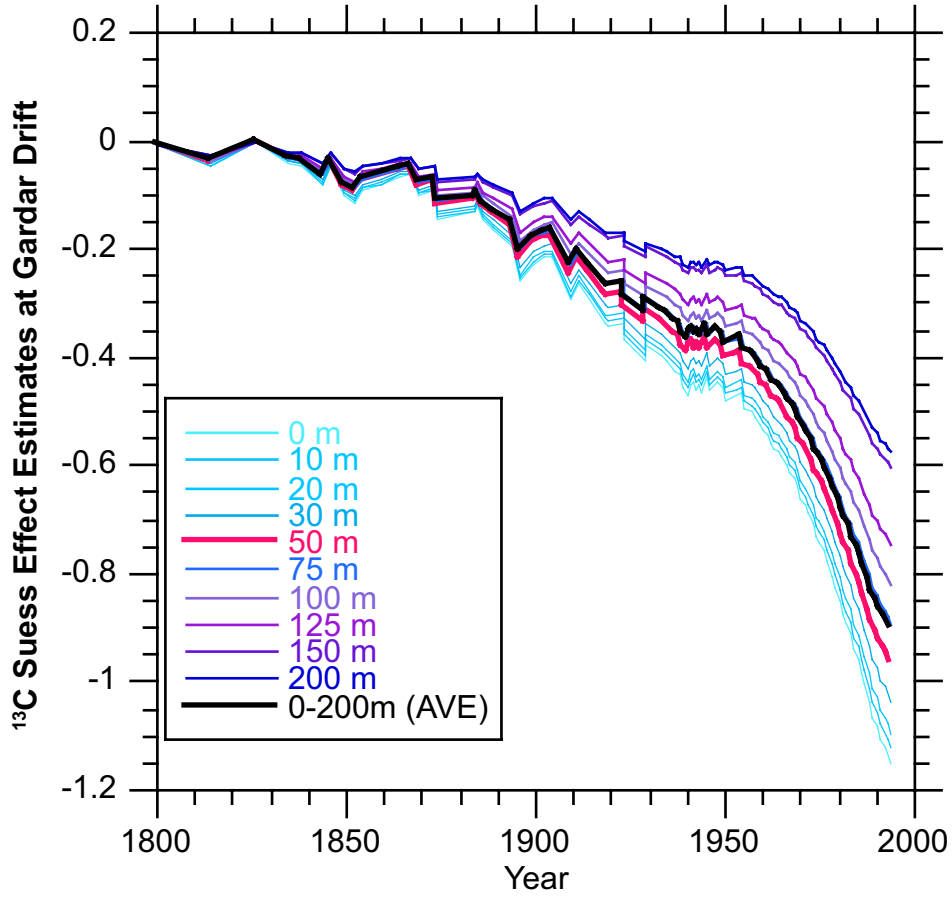

**Supplementary Figure 2:**  $^{13}\text{C}$  Suess effect estimates for Gardar Drift for the upper 200 m. The 0-200 m average ( $\delta^{13}\text{C}_{\text{SE}_0-200}$ ) is marked with black bold line and is used to compare with the  $\delta^{13}\text{C}_{\text{stack}}$  record.

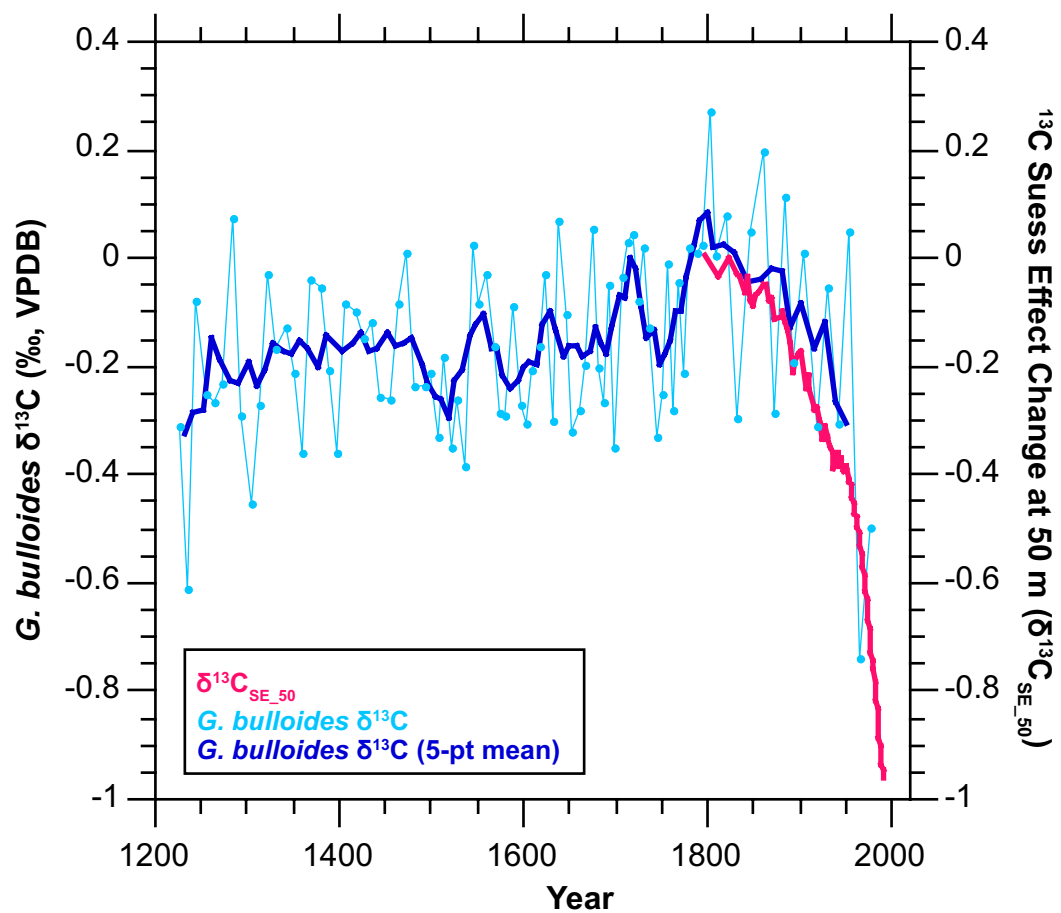

**Supplementary Figure 3:** *G. bulloides*  $\delta^{13}\text{C}$  vs  $\delta^{13}\text{C}_{\text{SE}_50}$  comparison, plotted on the final age model (as in Figure 5b).
