# Supplementary material for: Revising chronological uncertainties in marine archives using global anthropogenic signals: a case study
Source: Copernicus journal article supplement (doi:10.5194/egusphere-2023-2845), 2023-12-15
Supplement: Supplementary file 1 [file Irvali et al_Supplementary Data Files.xlsx]

## Sheet: Info
Supplementary Data
Revising chronological uncertainties in marine archives using global anthropogenic signals: a case study
Nil Irvalı, Ulysses S. Ninnemann, Are Olsen, Neil L. Rose, David J. R. Thornalley, Tor L. Mjell, Francois Counillon
The file contains:
(1) Planktonic stable isotope data (d13C) of GS06-144-09 MC-D (G. bulloides, N. incompta, G. inflata) and the d13Cstack record, SCP Concentrations.
(2) Gardar Drift 13C Suess effect estimates (0 - 200 m)
(3) GS06-144-09 MC-C SCP Concentraions
*Included age models for (1) and (3) are as shown in Figure 5b

## Sheet: 1. Stable Isotopes
Core	Depth (cm)	Year (AD)	G. bulloides d13C	N. incompta d13C	G. inflata d13C	d13C_Stack
GS06-144-09-MC D	0	1977	-0.495	0.34	0.615	0.153333
GS06-144-09-MC D	0.5	1966	-0.74	0.28	0.64	0.06
GS06-144-09-MC D	1	1954	0.05	0.49	0.93	0.49
GS06-144-09-MC D	1.5	1942	-0.305	0.66	0.92	0.425
GS06-144-09-MC D	2	1931	-0.055	0.51	0.93	0.461667
GS06-144-09-MC D	2.5	1918	-0.31	0.51	0.81	0.336667
GS06-144-09-MC D	3	1905	0.01	0.48	1.02	0.503333
GS06-144-09-MC D	3.5	1894	-0.19	0.46	1.05	0.44
GS06-144-09-MC D	4	1883	0.115	0.61	0.87	0.531667
GS06-144-09-MC D	4.5	1872	-0.285	0.46	0.99	0.388333
GS06-144-09-MC D	5	1861	0.2	0.43	1.07	0.566667
GS06-144-09-MC D	5.5	1847	0.05	0.62	0.99	0.553333
GS06-144-09-MC D	6	1832	-0.295	0.7	1.05	0.485
GS06-144-09-MC D	6.5	1821	0.08	0.62	0.93	0.543333
GS06-144-09-MC D	7	1810	0.005	0.55	1.25	0.601667
GS06-144-09-MC D	7.5	1802	0.27	0.71	0.99	0.656667
GS06-144-09-MC D	8	1793	0.025	0.59	1.21	0.608333
GS06-144-09-MC D	8.5	1787	0.01	0.44	1.1	0.516667
GS06-144-09-MC D	9	1781	0.02	0.58	1.07	0.556667
GS06-144-09-MC D	9.5	1775	-0.21	0.53	0.99	0.436667
GS06-144-09-MC D	10	1769	-0.045	0.67	0.96	0.528333
GS06-144-09-MC D	10.5	1762	-0.28	0.47	1.01	0.4
GS06-144-09-MC D	11	1756	-0.01	0.41	0.96	0.453333
GS06-144-09-MC D	11.5	1750	-0.25	0.45	1.12	0.44
GS06-144-09-MC D	12	1744	-0.33	0.44	1.09	0.4
GS06-144-09-MC D	12.5	1737	-0.125	0.51	1.01	0.465
GS06-144-09-MC D	13	1731	0.02	0.58	0.87	0.49
GS06-144-09-MC D	13.5	1725	-0.08	0.44	1.04	0.466667
GS06-144-09-MC D	14	1718	0.045	0.53	0.77	0.448333
GS06-144-09-MC D	14.5	1712	0.03	0.58	0.96	0.523333
GS06-144-09-MC D	15	1706	-0.035	0.44	0.85	0.418333
GS06-144-09-MC D	15.5	1699	-0.35	0.54	0.94	0.376667
GS06-144-09-MC D	16	1693	-0.05	0.45	0.67	0.356667
GS06-144-09-MC D	16.5	1687	-0.265	0.62	0.93	0.428333
GS06-144-09-MC D	17	1680	-0.2	0.46	0.97	0.41
GS06-144-09-MC D	17.5	1674	0.055	0.56	1.04	0.551667
GS06-144-09-MC D	18	1667	-0.195	0.46	0.79	0.351667
GS06-144-09-MC D	18.5	1660	-0.28	0.56	0.87	0.383333
GS06-144-09-MC D	19	1653	-0.32	0.33	1.03	0.346667
GS06-144-09-MC D	19.5	1646	-0.105	0.37	0.94	0.401667
GS06-144-09-MC D	20	1639	0.07	0.42	0.94	0.476667
GS06-144-09-MC D	20.5	1632	-0.3	0.4	0.89	0.33
GS06-144-09-MC D	21	1624	-0.03	0.29	0.83	0.363333
GS06-144-09-MC D	21.5	1617	-0.16	0.44	0.76	0.346667
GS06-144-09-MC D	22	1610	-0.205	0.32	0.86	0.325
GS06-144-09-MC D	22.5	1603	-0.305	0.48	0.88	0.351667
GS06-144-09-MC D	23	1596	-0.27	0.36	0.96	0.35
GS06-144-09-MC D	23.5	1588	-0.09	0.51	0.85	0.423333
GS06-144-09-MC D	24	1581	-0.29	0.47	0.95	0.376667
GS06-144-09-MC D	24.5	1574	-0.285	0.48	0.77	0.321667
GS06-144-09-MC D	25	1567	-0.16	0.41	0.9	0.383333
GS06-144-09-MC D	25.5	1559	-0.03	0.44	0.81	0.406667
GS06-144-09-MC D	26	1552	-0.085	0.5	0.95	0.455
GS06-144-09-MC D	26.5	1544	0.025	0.39	0.91	0.441667
GS06-144-09-MC D	27	1537	-0.385	0.32	0.87	0.268333
GS06-144-09-MC D	27.5	1529	-0.26	0.52	0.96	0.406667
GS06-144-09-MC D	28	1522	-0.35	0.46	0.99	0.366667
GS06-144-09-MC D	28.5	1514	-0.18	0.48	0.8	0.366667
GS06-144-09-MC D	29	1507	-0.33	0.49	1.04	0.4
GS06-144-09-MC D	29.5	1499	-0.21	0.51	0.95	0.416667
GS06-144-09-MC D	30	1492	-0.235	0.45	0.92	0.378333
GS06-144-09-MC D	30.5	1482	-0.235	0.5	0.81	0.358333
GS06-144-09-MC D	31	1473	0.01	0.58	0.96	0.516667
GS06-144-09-MC D	31.5	1463	-0.085	0.31	0.91	0.378333
GS06-144-09-MC D	32	1454	-0.26	0.39	0.91	0.346667
GS06-144-09-MC D	32.5	1444	-0.255	0.4	0.91	0.351667
GS06-144-09-MC D	33	1435	-0.115	0.42	0.79	0.365
GS06-144-09-MC D	33.5	1426	-0.145	0.34	0.93	0.375
GS06-144-09-MC D	34	1416	-0.1	0.29	0.92	0.37
GS06-144-09-MC D	34.5	1407	-0.085	0.56	0.9	0.458333
GS06-144-09-MC D	35	1398	-0.36	0.46	0.96	0.353333
GS06-144-09-MC D	35.5	1388	-0.205	0.42	0.97	0.395
GS06-144-09-MC D	36	1379	-0.055	0.45	1	0.465
GS06-144-09-MC D	36.5	1369	-0.04	0.27	1.1	0.443333
GS06-144-09-MC D	37	1360	-0.36	0.36	0.98	0.326667
GS06-144-09-MC D	37.5	1350	-0.21	0.29	0.95	0.343333
GS06-144-09-MC D	38	1341	-0.125	0.4	0.87	0.381667
GS06-144-09-MC D	38.5	1331	-0.165	0.49	0.9	0.408333
GS06-144-09-MC D	39	1322	-0.03	0.44	0.77	0.393333
GS06-144-09-MC D	39.5	1312	-0.27	0.4	0.87	0.333333
GS06-144-09-MC D	40	1303	-0.455	0.42	0.89	0.285
GS06-144-09-MC D	40.5	1294	-0.29	0.31	0.88	0.3
GS06-144-09-MC D	41	1284	0.075	0.5	1.02	0.531667
GS06-144-09-MC D	41.5	1274	-0.23	0.37	0.9	0.346667
GS06-144-09-MC D	42	1265	-0.265	0.39	1.03	0.385
GS06-144-09-MC D	42.5	1255	-0.25	0.42	0.91	0.36
GS06-144-09-MC D	43	1245	-0.08	0.38	0.91	0.403333
GS06-144-09-MC D	43.5	1235	-0.61	0.33	0.94	0.22
GS06-144-09-MC D	44	1225	-0.31	0.31	0.97	0.323333

## Sheet: 2. 13C Suess effect estimates
Year	0 m	10 m	20 m	30 m	50 m	75 m	100 m	125 m	150 m	200 m
1799.6	0	0	0	0	0	0	0	0	0	0
1814.2	-0.0485913	-0.0473745	-0.0461577	-0.0437242	-0.0406822	-0.0376402	-0.0345982	-0.0315562	-0.0254722	-0.0242554
1826.2	-0.00198021	-0.00193062	-0.00188104	-0.00178186	-0.00165789	-0.00153393	-0.00140996	-0.00128599	-0.00103805	-0.000988464
1834.5	-0.0392996	-0.0383155	-0.0373313	-0.0353631	-0.0329028	-0.0304425	-0.0279822	-0.0255219	-0.0206013	-0.0196172
1838	-0.0444786	-0.0433648	-0.042251	-0.0400234	-0.0372388	-0.0344543	-0.0316698	-0.0288853	-0.0233162	-0.0222024
1844	-0.0814933	-0.0794526	-0.0774119	-0.0733305	-0.0682287	-0.0631269	-0.0580251	-0.0529234	-0.0427198	-0.0406791
1846	-0.0453925	-0.0442558	-0.0431191	-0.0408458	-0.038004	-0.0351623	-0.0323205	-0.0294788	-0.0237953	-0.0226586
1849	-0.100229	-0.0977193	-0.0952094	-0.0901896	-0.0839149	-0.0776402	-0.0713655	-0.0650908	-0.0525414	-0.0500315
1852.3	-0.113024	-0.110194	-0.107364	-0.101703	-0.0946275	-0.0875517	-0.080476	-0.0734003	-0.0592488	-0.0564185
1854	-0.0895665	-0.0873236	-0.0850807	-0.080595	-0.0749878	-0.0693806	-0.0637734	-0.0581662	-0.0469519	-0.044709
1859	-0.0811887	-0.0791556	-0.0771225	-0.0730563	-0.0679736	-0.0628909	-0.0578082	-0.0527255	-0.0425601	-0.040527
1864	-0.06489	-0.0632651	-0.0616401	-0.0583902	-0.0543279	-0.0502655	-0.0462032	-0.0421409	-0.0340162	-0.0323912
1867	-0.0619958	-0.0604434	-0.0588909	-0.055786	-0.0519048	-0.0480237	-0.0441425	-0.0402613	-0.032499	-0.0309465
1869.1	-0.0996199	-0.0971252	-0.0946306	-0.0896414	-0.0834048	-0.0771682	-0.0709317	-0.0646951	-0.052222	-0.0497274
1873	-0.091699	-0.0894027	-0.0871065	-0.0825139	-0.0767732	-0.0710325	-0.0652918	-0.0595512	-0.0480698	-0.0457735
1874	-0.142728	-0.139153	-0.135579	-0.128431	-0.119496	-0.110561	-0.101625	-0.0926901	-0.0748196	-0.0712455
1884	-0.131913	-0.128609	-0.125306	-0.118699	-0.110441	-0.102183	-0.0939248	-0.0856666	-0.0691502	-0.0658469
1884.4	-0.119727	-0.116728	-0.11373	-0.107734	-0.100239	-0.0927435	-0.0852482	-0.0777528	-0.0627622	-0.0597641
1886	-0.144251	-0.140639	-0.137026	-0.129802	-0.120771	-0.111741	-0.10271	-0.0936793	-0.0756181	-0.0720058
1889	-0.163291	-0.159202	-0.155113	-0.146935	-0.136712	-0.12649	-0.116267	-0.106045	-0.0855993	-0.0815103
1894	-0.193299	-0.188459	-0.183618	-0.173937	-0.161836	-0.149735	-0.137633	-0.125532	-0.10133	-0.0964893
1896	-0.259103	-0.252615	-0.246126	-0.23315	-0.216929	-0.200708	-0.184487	-0.168267	-0.135825	-0.129337
1899	-0.227724	-0.222022	-0.216319	-0.204914	-0.190658	-0.176401	-0.162145	-0.147889	-0.119376	-0.113673
1902	-0.215843	-0.210438	-0.205033	-0.194223	-0.18071	-0.167198	-0.153685	-0.140173	-0.113148	-0.107743
1904	-0.212797	-0.207468	-0.202139	-0.191482	-0.17816	-0.164838	-0.151516	-0.138194	-0.111551	-0.106222
1909	-0.293985	-0.286623	-0.279262	-0.264538	-0.246133	-0.227729	-0.209324	-0.19092	-0.154111	-0.146749
1911.5	-0.262606	-0.25603	-0.249454	-0.236302	-0.219862	-0.203422	-0.186982	-0.170542	-0.137662	-0.131086
1914	-0.292462	-0.285138	-0.277815	-0.263167	-0.244858	-0.226549	-0.20824	-0.189931	-0.153312	-0.145989
1918.6	-0.336941	-0.328503	-0.320066	-0.303191	-0.282097	-0.261003	-0.23991	-0.218816	-0.176628	-0.168191
1919	-0.341206	-0.332661	-0.324117	-0.307029	-0.285668	-0.264307	-0.242946	-0.221586	-0.178864	-0.17032
1923	-0.335874	-0.327464	-0.319053	-0.302231	-0.281204	-0.260177	-0.23915	-0.218123	-0.17607	-0.167659
1923.6	-0.366339	-0.357165	-0.347992	-0.329644	-0.30671	-0.283776	-0.260842	-0.237908	-0.19204	-0.182866
1928.8	-0.405486	-0.395332	-0.385178	-0.36487	-0.339486	-0.314101	-0.288716	-0.263331	-0.212561	-0.202407
1929	-0.37426	-0.364888	-0.355516	-0.336772	-0.313342	-0.289912	-0.266482	-0.243052	-0.196192	-0.18682
1933	-0.396956	-0.387016	-0.377075	-0.357195	-0.332344	-0.307493	-0.282642	-0.257791	-0.208089	-0.198149
1934.5	-0.406248	-0.396075	-0.385902	-0.365556	-0.340123	-0.314691	-0.289258	-0.263825	-0.21296	-0.202787
1936.5	-0.42407	-0.413451	-0.402831	-0.381593	-0.355044	-0.328496	-0.301948	-0.275399	-0.222303	-0.211683
1938	-0.432752	-0.421916	-0.411079	-0.389405	-0.362314	-0.335222	-0.30813	-0.281038	-0.226854	-0.216017
1939	-0.453773	-0.44241	-0.431047	-0.408321	-0.379913	-0.351505	-0.323097	-0.294689	-0.237874	-0.22651
1940	-0.468396	-0.456667	-0.444938	-0.421479	-0.392156	-0.362832	-0.333509	-0.304186	-0.245539	-0.23381
1941	-0.450117	-0.438846	-0.427574	-0.405031	-0.376852	-0.348673	-0.320494	-0.292315	-0.235957	-0.224686
1941.5	-0.444024	-0.432905	-0.421786	-0.399548	-0.371751	-0.343953	-0.316156	-0.288358	-0.232763	-0.221644
1942	-0.459104	-0.447608	-0.436111	-0.413118	-0.384376	-0.355635	-0.326893	-0.298151	-0.240668	-0.229172
1943	-0.451184	-0.439885	-0.428587	-0.40599	-0.377745	-0.349499	-0.321253	-0.293008	-0.236516	-0.225218
1944	-0.463674	-0.452063	-0.440452	-0.41723	-0.388202	-0.359174	-0.330147	-0.301119	-0.243064	-0.231453
1945	-0.435646	-0.424737	-0.413828	-0.39201	-0.364737	-0.337464	-0.31019	-0.282917	-0.228371	-0.217462
1946	-0.461694	-0.450132	-0.438571	-0.415448	-0.386544	-0.357641	-0.328737	-0.299833	-0.242026	-0.230464
1947	-0.450879	-0.439588	-0.428298	-0.405716	-0.37749	-0.349263	-0.321036	-0.29281	-0.236356	-0.225066
1948	-0.446614	-0.43543	-0.424246	-0.401878	-0.373919	-0.345959	-0.317999	-0.29004	-0.234121	-0.222937
1949	-0.456972	-0.445529	-0.434085	-0.411199	-0.382591	-0.353983	-0.325375	-0.296767	-0.23955	-0.228107
1950	-0.478297	-0.46632	-0.454343	-0.430388	-0.400445	-0.370502	-0.340559	-0.310616	-0.250729	-0.238752
1953	-0.470833	-0.459043	-0.447253	-0.423672	-0.394196	-0.36472	-0.335244	-0.305768	-0.246817	-0.235026
1954	-0.465045	-0.4534	-0.441754	-0.418463	-0.38935	-0.360236	-0.331123	-0.302009	-0.243782	-0.232137
1955	-0.494901	-0.482507	-0.470114	-0.445328	-0.414346	-0.383363	-0.352381	-0.321398	-0.259433	-0.24704
1957	-0.500993	-0.488448	-0.475902	-0.450811	-0.419447	-0.388083	-0.356719	-0.325355	-0.262627	-0.250081
1958	-0.507543	-0.494834	-0.482124	-0.456705	-0.424931	-0.393157	-0.361383	-0.329609	-0.266061	-0.253351
1959	-0.522928	-0.509833	-0.496738	-0.470549	-0.437811	-0.405074	-0.372337	-0.3396	-0.274125	-0.261031
1960	-0.535266	-0.521863	-0.508459	-0.481651	-0.448141	-0.414632	-0.381122	-0.347613	-0.280593	-0.26719
1961	-0.545472	-0.531813	-0.518153	-0.490834	-0.456686	-0.422537	-0.388389	-0.35424	-0.285943	-0.272284
1962	-0.557353	-0.543396	-0.529439	-0.501526	-0.466633	-0.431741	-0.396849	-0.361956	-0.292172	-0.278215
1963	-0.567254	-0.55305	-0.538845	-0.510435	-0.474923	-0.439411	-0.403898	-0.368386	-0.297362	-0.283157
1964	-0.574718	-0.560326	-0.545935	-0.517151	-0.481172	-0.445192	-0.409213	-0.373233	-0.301275	-0.286883
1965	-0.581116	-0.566564	-0.552012	-0.522908	-0.486528	-0.450148	-0.413768	-0.377388	-0.304628	-0.290076
1966	-0.600766	-0.585722	-0.570678	-0.540589	-0.502979	-0.465369	-0.427759	-0.390149	-0.314929	-0.299885
1967	-0.613409	-0.598048	-0.582687	-0.551966	-0.513564	-0.475163	-0.436761	-0.39836	-0.321556	-0.306196
1968	-0.624376	-0.608741	-0.593105	-0.561835	-0.522747	-0.483658	-0.44457	-0.405482	-0.327306	-0.31167
1969	-0.639304	-0.623295	-0.607285	-0.575267	-0.535245	-0.495222	-0.455199	-0.415176	-0.335131	-0.319122
1970	-0.660934	-0.644383	-0.627832	-0.594731	-0.553354	-0.511977	-0.4706	-0.429223	-0.34647	-0.329919
1971	-0.67449	-0.6576	-0.64071	-0.60693	-0.564704	-0.522479	-0.480253	-0.438027	-0.353576	-0.336686
1972	-0.6882	-0.670966	-0.653733	-0.619266	-0.576182	-0.533098	-0.490014	-0.44693	-0.360763	-0.343529
1973	-0.707545	-0.689827	-0.672109	-0.636673	-0.592378	-0.548083	-0.503788	-0.459494	-0.370904	-0.353186
1974	-0.73146	-0.713143	-0.694826	-0.658192	-0.6124	-0.566608	-0.520816	-0.475024	-0.38344	-0.365124
1975	-0.740294	-0.721756	-0.703218	-0.666142	-0.619797	-0.573452	-0.527107	-0.480762	-0.388072	-0.369534
1976	-0.757507	-0.738538	-0.719569	-0.681631	-0.634208	-0.586785	-0.539363	-0.49194	-0.397095	-0.378126
1977	-0.775177	-0.755765	-0.736353	-0.69753	-0.649002	-0.600473	-0.551944	-0.503415	-0.406357	-0.386946
1978	-0.803204	-0.783091	-0.762977	-0.722751	-0.672467	-0.622184	-0.5719	-0.521617	-0.42105	-0.400936
1979	-0.823311	-0.802694	-0.782077	-0.740843	-0.689301	-0.637759	-0.586217	-0.534674	-0.43159	-0.410973
1980	-0.849054	-0.827792	-0.806531	-0.764008	-0.710854	-0.6577	-0.604546	-0.551392	-0.445085	-0.423823
1981	-0.874644	-0.852742	-0.830839	-0.787035	-0.732279	-0.677523	-0.622767	-0.568011	-0.458499	-0.436597
1982	-0.891247	-0.868929	-0.846611	-0.801975	-0.74618	-0.690384	-0.634589	-0.578794	-0.467203	-0.444885
1983	-0.909983	-0.887196	-0.864409	-0.818834	-0.761866	-0.704898	-0.647929	-0.590961	-0.477025	-0.454237
1984	-0.940296	-0.916749	-0.893203	-0.84611	-0.787244	-0.728378	-0.669513	-0.610647	-0.492915	-0.469368
1985	-0.959489	-0.935462	-0.911435	-0.863381	-0.803313	-0.743246	-0.683178	-0.623111	-0.502976	-0.478949
1986	-0.980662	-0.956104	-0.931547	-0.882433	-0.82104	-0.759647	-0.698254	-0.636861	-0.514075	-0.489518
1987	-1.00229	-0.977193	-0.952094	-0.901896	-0.839149	-0.776402	-0.713655	-0.650908	-0.525414	-0.500315
1988	-1.03611	-1.01016	-0.984216	-0.932325	-0.867461	-0.802597	-0.737733	-0.672869	-0.543141	-0.517195
1989	-1.06474	-1.03808	-1.01142	-0.958093	-0.891437	-0.82478	-0.758123	-0.691466	-0.558152	-0.53149
1990	-1.08333	-1.0562	-1.02907	-0.974816	-0.906995	-0.839175	-0.771355	-0.703535	-0.567894	-0.540766
1991	-1.10618	-1.07848	-1.05078	-0.995375	-0.926125	-0.856874	-0.787624	-0.718373	-0.579872	-0.552171
1992	-1.12217	-1.09407	-1.06597	-1.00977	-0.939516	-0.869264	-0.799012	-0.72876	-0.588256	-0.560155
1993	-1.13527	-1.10684	-1.07841	-1.02156	-0.950483	-0.879411	-0.808339	-0.737267	-0.595123	-0.566694
1994	-1.15172	-1.12288	-1.09404	-1.03636	-0.964256	-0.892154	-0.820053	-0.747951	-0.603747	-0.574906

## Sheet: 3. SCP Concentrations
Core	Depth (cm)	Age (Year AD)	SCP Conc (gDM-1)	Upper 90% C.L. (gDM-1)	Lower 90% (gDM-1)
GS06-144-09-MC C	0	1977	278.094	550.626	5.56188
GS06-144-09-MC C	0.5	1966	615.848	964.297	267.399
GS06-144-09-MC C	1	1954	189.902	376.005	3.79803
GS06-144-09-MC C	1.5	1942	272.01	460.503	83.5167
GS06-144-09-MC C	2	1931	151.684	300.334	3.03367
GS06-144-09-MC C	2.5	1918	0	0	0
GS06-144-09-MC C	3	1905	0	0	0
GS06-144-09-MC C	3.5	1894	0	0	0
GS06-144-09-MC C	4	1883	0	0	0
GS06-144-09-MC C	4.5	1872	0	0	0
GS06-144-09-MC C	5	1861	0	0	0
GS06-144-09-MC C	5.5	1847	0	0	0
GS06-144-09-MC C	6	1832	0	0	0
GS06-144-09-MC C	6.5	1821	0	0	0
GS06-144-09-MC C	7	1810	0	0	0
GS06-144-09-MC C	7.5	1802	0	0	0
GS06-144-09-MC C	8	1793	0	0	0
