# Supplementary material for: Revising chronological uncertainties in marine archives using global anthropogenic signals: a case study
Source: Copernicus journal article supplement (doi:10.5194/egusphere-2023-2845), 2023-12-15
Supplement: Supplementary file 2 [file Irvali et al_Supplementary Tables.xlsx]

## Sheet: Info
Supplementary Tables
Revising chronological uncertainties in marine archives using global anthropogenic signals: a case study
Nil Irvalı, Ulysses S. Ninnemann, Are Olsen, Neil L. Rose, David J. R. Thornalley, Tor L. Mjell, Francois Counillon
The file contains:
Supplementary Table 1: Goodness of fit results for each 3rd degree polynomial curve fit used and correlation coefficients for target curve vs G. bulloides d13C curves (different starting points and including 3-pt, 5pt mean and d13Cstack).
Supplementary Table 2: ΔR values for GS06-144-09 MC (60°19 N, 23°58 W), located south of Iceland, derived from the nearest points available in the marine reservoir database (Reimer and Reimer, 2001).

## Sheet: Supplementary Table1
Curve Fits	Goodness of fit results							Polynomial Coefficients				Correlation	r
	Fit type	SSE	R-square	DFE	Adj-R-sq	RMSE	# Coeff	p1	p2	p3	p4
Target Curve_1 (Δ13CSE_50)	poly3	0.127884	0.979436	88	0.978735	0.0381212	4	-0.0333	-0.1417	-0.2685	-0.2936
G. bulloides d13C Intervals
G.bull_5cm_poly3	poly3	0.426813	0.461413	7	0.230591	0.246928	4	0.09309	-0.05468	0.0238	-0.1326	Δ13CSE_50 vs G. bull_(0-5cm)	0.685827
G.bull_5.5cm_poly3	poly3	0.439898	0.477508	8	0.281573	0.234494	4	0.07299	-0.05641	0.05876	-0.1112	Δ13CSE_50 vs G. bull_(0-5.5cm)	0.488882
G.bull_6cm_poly3	poly3	0.517466	0.396912	9	0.195882	0.239784	4	-0.1326	-0.1194	0.1492	-0.06287	Δ13CSE_50 vs G. bull_(0-6cm)	-0.651471
G.bull_6.5cm_poly3	poly3	0.546972	0.403846	10	0.224999	0.233874	4	0.04493	-0.09285	0.07096	-0.06878	Δ13CSE_50 vs G. bull_(0-6.5cm)	0.148435
G.bull_7cm_poly3	poly3	0.547035	0.418909	11	0.26043	0.223003	4	0.05252	-0.08975	0.0566	-0.06057	Δ13CSE_50 vs G. bull_(0-7cm)	0.217225
G.bull_7.5cm_poly3	poly3	0.563446	0.488862	12	0.361077	0.216688	4	0.09843	-0.05177	0.004803	-0.06991	Δ13CSE_50 vs G. bull_(0-7.5cm)	0.726187
G.bull_8cm_poly3	poly3	0.599265	0.465753	13	0.342465	0.214703	4	-0.06057	-0.06398	0.04717	-0.04978	Δ13CSE_50 vs G. bull_(0-8cm)	-0.542338
G.bull_8.5cm_poly3	poly3	0.617634	0.455973	14	0.339396	0.21004	4	0.05033	-0.07528	0.07247	-0.03224	Δ13CSE_50 vs G. bull_(0-8.5cm)	0.0722846
G.bull_9cm_poly3	poly3	0.623857	0.457379	15	0.348855	0.203937	4	0.04162	-0.08245	0.08153	-0.01874	Δ13CSE_50 vs G. bull_(0-9cm)	-0.078847
G.bull_10cm_poly3	poly3	0.667728	0.426855	17	0.325711	0.198187	4	0.01577	-0.1165	0.09328	0.01121	Δ13CSE_50 vs G. bull_(0-10cm)	-0.370904
G.bull_11cm_poly3	poly3	0.71328	0.40817	19	0.314723	0.193755	4	0.02536	-0.1311	0.05098	0.02166	Δ13CSE_50 vs G. bull_(0-11cm)	-0.280441
G.bull_12cm_poly3	poly3	0.721313	0.433053	21	0.352061	0.185333	4	0.01054	-0.1611	0.03719	0.03603	Δ13CSE_50 vs G. bull_(0-12cm)	-0.357758
G. bulloides d13C (3pt mean) Intervals
G.bull_5cm_3pt_poly3	poly3	0.0308351	0.811778	6	0.717667	0.0716881	4	-0.07986	-0.03467	0.06262	-0.1166	Δ13CSE_50 vs G. bull_3pt_(0-5cm)	-0.216198
G.bull_5.5cm_3pt_poly3	poly3	0.0328385	0.817426	7	0.739179	0.0684925	4	-0.1166	-0.04056	0.07793	-0.09889	Δ13CSE_50 vs G. bull_3pt_(0-5.5cm)	-0.474357
G.bull_6cm_3pt_poly3	poly3	0.0353053	0.810025	8	0.738785	0.0664316	4	0.00942	-0.05363	0.0922	-0.07986	Δ13CSE_50 vs G. bull_3pt_(0-6cm)	0.00375456
G.bull_6.5cm_3pt_poly3	poly3	0.0356825	0.811262	9	0.748349	0.062966	4	-0.09889	-0.06421	0.09095	-0.06522	Δ13CSE_50 vs G. bull_3pt_(0-6.5cm)	-0.591003
G.bull_7cm_3pt_poly3	poly3	0.0476413	0.804594	10	0.745972	0.0690226	4	0.04177	-0.04077	0.04466	-0.06929	Δ13CSE_50 vs G. bull_3pt_(0-7cm)	0.400029
G.bull_7.5cm_3pt_poly3	poly3	0.0477784	0.83168	11	0.785774	0.0659052	4	0.04755	-0.03248	0.04278	-0.06302	Δ13CSE_50 vs G. bull_3pt_(0-7.5cm)	0.455433
G.bull_8cm_3pt_poly3	poly3	0.0500363	0.843394	12	0.804242	0.0645731	4	0.04436	-0.02986	0.05313	-0.05315	Δ13CSE_50 vs G. bull_3pt_(0-8cm)	0.35197
G.bull_8.5cm_3pt_poly3	poly3	0.0622948	0.810549	13	0.76683	0.0692236	4	0.02493	-0.04164	0.0806	-0.0361	Δ13CSE_50 vs G. bull_3pt_(0-8.5cm)	-0.0408052
G.bull_9cm_3pt_poly3	poly3	0.0746688	0.773069	14	0.724441	0.0730307	4	0.003294	-0.06031	0.105	-0.01748	Δ13CSE_50 vs G. bull_3pt_(0-9cm)	-0.354853
G.bull_10cm_3pt_poly3	poly3	0.0810549	0.761087	16	0.71629	0.0711754	4	-0.02101	-0.09574	0.116	0.01112	Δ13CSE_50 vs G. bull_3pt_(0-10cm)	-0.573464
G.bull_11cm_3pt_poly3	poly3	0.0852175	0.756187	18	0.715552	0.0688063	4	-0.01035	-0.1111	0.07394	0.02022	Δ13CSE_50 vs G. bull_3pt_(0-11cm)	-0.523486
G.bull_12cm_3pt_poly3	poly3	0.0880111	0.769144	20	0.734516	0.0663367	4	0.0002429	-0.1248	0.029	0.02296	Δ13CSE_50 vs G. bull_3pt_(0-12cm)	-0.391675
G. bulloides d13C (5pt mean) Intervals
G.bull_5cm_5pt_poly3	poly3	0.0104027	0.877635	5	0.804216	0.0456129	4	0.007538	-0.0312	0.08107	-0.104	Δ13CSE_50 vs G. bull_5pt_(0-5cm)	0.155773
G.bull_5.5cm_5pt_poly3	poly3	0.0106291	0.883238	6	0.824858	0.0420894	4	0.00207	-0.04056	0.08492	-0.0871	Δ13CSE_50 vs G. bull_5pt_(0-5.5cm)	0.0361169
G.bull_6cm_5pt_poly3	poly3	0.0114425	0.892837	7	0.84691	0.0404307	4	0.01596	-0.03546	0.0665	-0.0794	Δ13CSE_50 vs G. bull_5pt_(0-6cm)	0.174038
G.bull_6.5cm_5pt_poly3	poly3	0.0122936	0.889725	8	0.848371	0.0392007	4	0.008619	-0.04397	0.07305	-0.06536	Δ13CSE_50 vs G. bull_5pt_(0-6.5cm)	0.0189003
G.bull_7cm_5pt_poly3	poly3	0.0128182	0.886217	9	0.84829	0.0377391	4	0.002547	-0.05444	0.07433	-0.05267	Δ13CSE_50 vs G. bull_5pt_(0-7cm)	-0.110942
G.bull_7.5cm_5pt_poly3	poly3	0.01202	0.926	10	0.9039	0.03467		0.0276	-0.02816	0.05722	-0.05321	Δ13CSE_50 vs G. bull_5pt_(0-7.5cm)	0.216919
G.bull_8cm_5pt_poly3	poly3	0.0129037	0.929208	11	0.909902	0.03425	4	0.02487	-0.02851	0.06422	-0.04306	Δ13CSE_50 vs G. bull_5pt_(0-8cm)	0.102818
G.bull_8.5cm_5pt_poly3	poly3	0.016422	0.913717	12	0.892146	0.0369933	4	0.01377	-0.03674	0.07933	-0.02943	Δ13CSE_50 vs G. bull_5pt_(0-8.5cm)	-0.15296
G.bull_9cm_5pt_poly3	poly3	0.0212581	0.888622	13	0.862919	0.0404381	4	-0.001157	-0.05138	0.09486	-0.01411	Δ13CSE_50 vs G. bull_5pt_(0-9cm)	-0.390807
G.bull_10cm_5pt_poly3	poly3	0.0242425	0.874917	15	0.849901	0.0402016	4	-0.01539	-0.07963	0.09343	0.008699	Δ13CSE_50 vs G. bull_5pt_(0-10cm)	-0.561105
G.bull_11cm_5pt_poly3	poly3	0.0250387	0.882871	17	0.862202	0.0383779	4	-0.01453	-0.1016	0.0637	0.02009	Δ13CSE_50 vs G. bull_5pt_(0-11cm)	-0.555228
G.bull_12cm_5pt_poly3	poly3	0.0387256	0.832457	19	0.806003	0.0451463	4	0.009489	0.009489	0.003233	0.0153	Δ13CSE_50 vs G. bull_5pt_(0-12cm)	-0.0607714
Target Curve_2 (Δ13CSE_0-200)	poly3	0.111592	0.979438	88	0.978738	0.0356102	4	-0.0871	-0.1324	-0.2508	-0.2742
d13Cstack Intervals
d13Cstack _ 0-5cm	poly3	0.0903089	0.639255	7	0.484651	0.113584	4	0.06084	-0.0612	0.00939	0.4517	Δ13CSE_0-200 vs d13Cstack (0-5cm)	-0.602621
d13C stack_0-5.5cm_poly3	poly3	0.0916789	0.664197	8	0.538271	0.107051	4	0.06309	-0.05325	0.008868	0.458	Δ13CSE_0-200 vs d13Cstack (0-5.5cm)	-0.598025
d13C stack_0-6cm_poly3	poly3	0.101042	0.636962	9	0.515949	0.105957	4	0.04437	-0.06242	0.03164	0.4726	Δ13CSE_0-200 vs d13Cstack (0-6cm)	-0.656618
d13C stack_0-6.5cm_poly3	poly3	0.101576	0.654052	10	0.550268	0.100785	4	0.04743	-0.05889	0.02664	0.4789	Δ13CSE_0-200 vs d13Cstack (0-6.5cm)	-0.645797
d13C stack_0-7cm_poly3	poly3	0.101602	0.685463	11	0.599681	0.0961069	4	0.05642	-0.04919	0.01716	0.4819	Δ13CSE_0-200 vs d13Cstack (0-7cm)	-0.620212
d13C stack_0-7.5cm_poly3	poly3	0.101765	0.723969	12	0.654962	0.092089	4	0.06458	-0.03729	0.01241	0.4847	Δ13CSE_0-200 vs d13Cstack (0-7.5cm)	-0.600891
d13C stack_0-8cm_poly3	poly3	0.109908	0.719856	13	0.655208	0.0919483	4	0.05424	-0.03843	0.03103	0.4953	Δ13CSE_0-200 vs d13Cstack (0-8cm)	-0.640576
d13C stack_0-8.5cm_poly3	poly3	0.128963	0.673889	14	0.604008	0.0959772	4	0.03162	-0.05231	0.0609	0.5117	Δ13CSE_0-200 vs d13Cstack (0-8.5cm)	-0.705869
d13C stack_0-9cm_poly3	poly3	0.131377	0.674721	15	0.609665	0.0935867	4	0.02624	-0.05729	0.06634	0.5216	Δ13CSE_0-200 vs d13Cstack (0-9cm)	-0.717285
d13C stack_0-10cm_poly3	poly3	0.144462	0.64637	17	0.583964	0.0921832	4	0.0132	-0.07638	0.07068	0.5415	Δ13CSE_0-200 vs d13Cstack (0-10cm)	-0.733305
d13C stack_0-11cm_poly3	poly3	0.149934	0.637108	19	0.579809	0.0888328	4	0.007475	-0.09439	0.05896	0.5554	Δ13CSE_0-200 vs d13Cstack (0-11cm)	-0.725165
d13C stack_0-12cm_poly3	poly3	0.150535	0.639611	21	0.588127	0.084666	4	0.01443	-0.1025	0.02979	0.5598	Δ13CSE_0-200 vs d13Cstack (0-12cm)	-0.688352

## Sheet: Supplementary Table 2
MapNo	Lon	Lat	DeltaR	DeltaRErr	Reference	Locality	LabID	Genus	Species	Feeding	Name	Distance (km)
57	-22	64	-60	51	Broecker, W :1961	Faxa Bay, Kollafjord, Iceland	L-576C	Nucella	lapillus	Carnivore	Gastropod	397	a
58	-22	64	18	51	Broecker, W :1961	Faxa Bay, Kollafjord, Iceland	L-576H	Nucella	lapillus	Carnivore	Gastropod	397	a
59	-22	64	57	51	Broecker, W :1961	Faxa Bay, Kollafjord, Iceland	L-5761	Nucella	lapillus	Carnivore	Gastropod	397	a, c
64	-22.2	64.12	-103	42	Håkansson S:1984	Faxafloi, SW Iceland (48 m)	Lu-2010	Arctica	islandica	suspension	Bivalve	408	a, b, c, d
63	-22.5	64.33	-134	35	Håkansson S:1984	Faxafloi, SW Iceland (33m)	Lu-2009	Macoma	calcarea	Deposit	Bivalve	429	a, c
66	-22	64.33	-220	85	Olsson, I U,:1980	Faxe Bugt, Iceland	K-330	Mytilus	edulis	suspension	Bivalve	433	a, b, c, d
60	-22	65.17	-108	35	Håkansson S:1984	Reykajavik, SW Iceland (3 m)	Lu-2006	Mytilus	edulis	suspension	Bivalve	525	a, b
1847	-18	66	-23	45	Scourse et al., 2012	Grimsey, NIS	AAR-12282	Arctica	islandica	suspension	Bivalve	670	a, b
1848	-18	66	-44	23	Scourse et al., 2012	Grimsey, NIS	AAR-12283	Arctica	islandica	suspension	Bivalve	670	a, b
1982	-18.1957	66.5265	-156	43	Wanamaker, et al. 2012	Grimsey, North Icelandic shelf	AAR-12284	Arctica	islandica	suspension	Bivalve	719	a, b
61	-14.25	64.67	-135	41	Håkansson S:1984	Djupivogur, E. Iceland (6 m)	Lu-2007	Mytilus	edulis	suspension	Bivalve	662	c, d
a Using nearest 10 points: △R = -72 ±64
b Using nearest 10 points (Deposit feeders and carnivores excluded): △R = -80 ±54
c Using only southern Iceland locations: △R = -92 ±93
d Using only southern Iceland locations (Deposit feeders and carnivores excluded): △R = -126 ±66
*All data are extracted from calib.org (Reimer and Reimer, 2001)
